# Supplementary material for: The Role of Vascular Risk Factors in Post-Stroke Delirium: A Systematic Review and Meta-Analysis
Source: MDPI journal article supplement (doi:10.3390/jcm11195835), 2022-10-01
Supplement: s1 [file s1]

**Figures S3a to S3f. The Forest Plots presenting the results from meta-analysis of age, AF, prior stroke, CAD, HF, PVD and PSD in stroke/TIA subgroup**

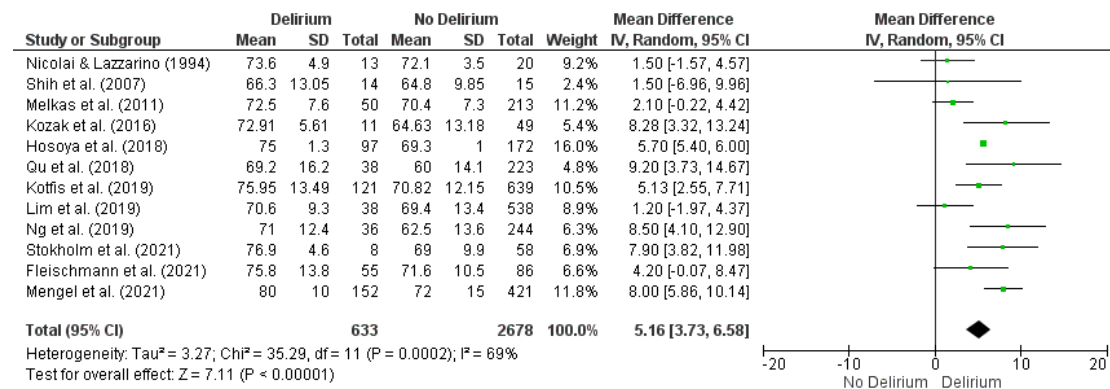

**Figures S3a. The Forest Plot presenting the results from meta-analysis of age and PSD in stroke/TIA subgroup**

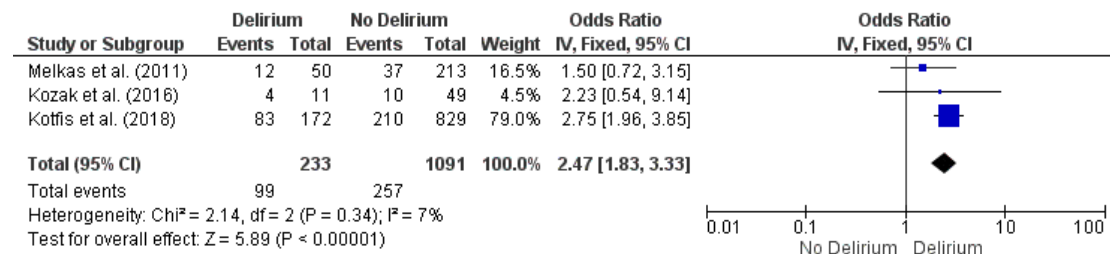

**Figures S3b. The Forest Plot presenting the results from meta-analysis of AF and PSD in stroke/TIA subgroup**

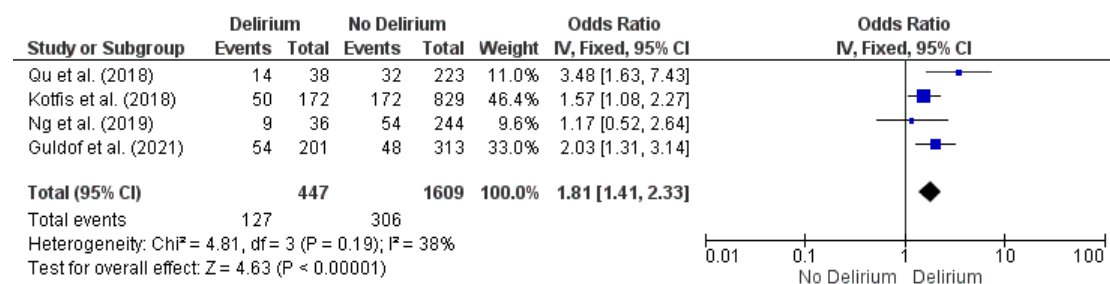

**Figures S3c. The Forest Plot presenting the results from meta-analysis of prior stroke and PSD in stroke/TIA subgroup**

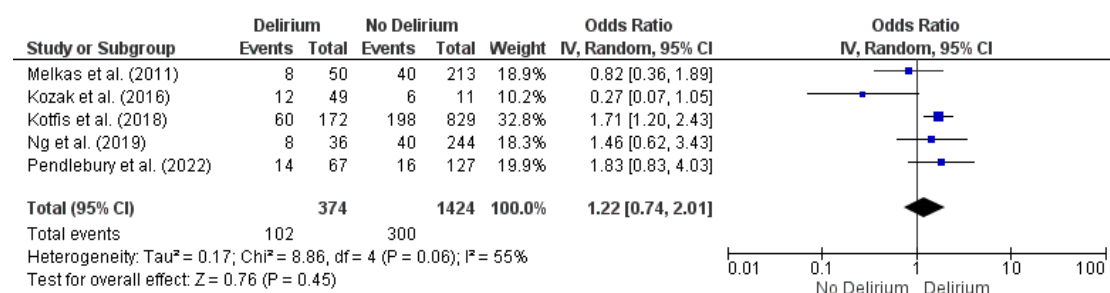

**Figures S3d. The Forest Plot presenting the results from meta-analysis of CAD and PSD in stroke/TIA subgroup**

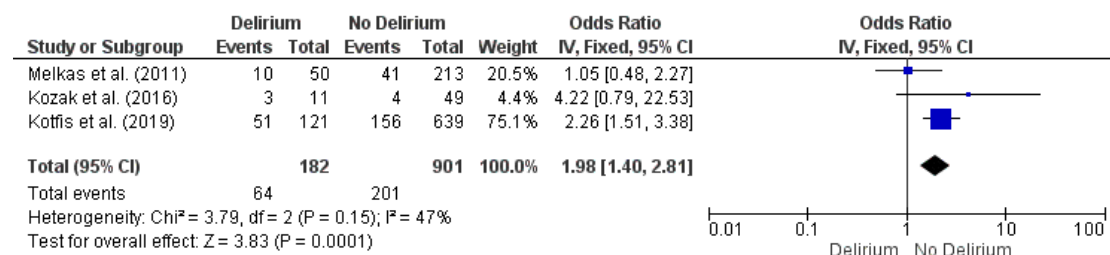

**Figures S3e. The Forest Plot presenting the results from meta-analysis of HF and PSD in stroke/TIA subgroup**

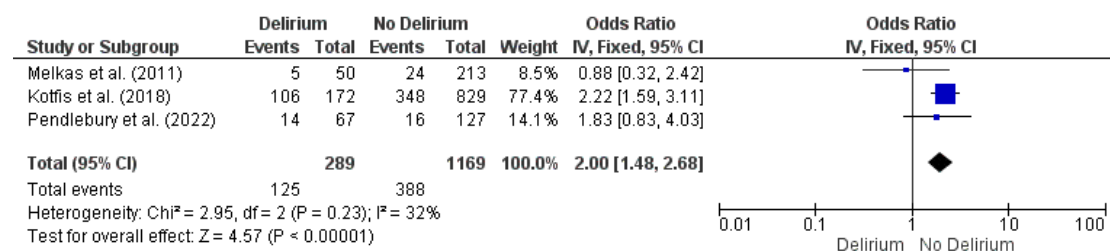

**Figures S3f. The Forest Plot presenting the results from meta-analysis of PVD and PSD in stroke/TIA subgroup**
