# Supplementary material for: The Role of Vascular Risk Factors in Post-Stroke Delirium: A Systematic Review and Meta-Analysis
Source: MDPI journal article supplement (doi:10.3390/jcm11195835), 2022-10-01
Supplement: s1 [file s1]

| <b>Table 1.</b> Characteristics of the included studies |                        |                |        |                                                   |                  |                 |                                                                              |
|---------------------------------------------------------|------------------------|----------------|--------|---------------------------------------------------|------------------|-----------------|------------------------------------------------------------------------------|
| Author (Year)                                           | Ethnicity/Loc<br>ation | Phenotypes     | Sample |                                                   |                  | Delirium        |                                                                              |
|                                                         |                        |                | N      | Mean Age, (SD) (y)                                | Female/Male      | Assessment      | Time                                                                         |
| Gustafson et al. (1991)                                 | Sweden                 | CI, TIA, ICH   | 145    | 73 <sup>^</sup>                                   | 55/90            | DSM-III-R       | Within 7 days of admission                                                   |
| Nicolai & Lazzarino (1994)                              | Italy                  | PCA infraction | 33     | Confusion: 73.6 (4.9)<br>No Confusion: 72.1 (3.5) | 5/8 in PCA cases | Clinical/MMSE   | NA                                                                           |
| Henon et al. (1999)                                     | France                 | CI, hemorrhage | 202    | 75 <sup>^</sup>                                   | 105/97           | DSM-IV, DRS     | After admission in SI, during hospitalization                                |
| Caerio et al. (2004)                                    | Portugal               | SAH, ICH, CI   | 218    | 57.3 (13)                                         | 88/130           | DSM-IV, DRS     | Within 4 days of admission                                                   |
| Sheng et al. (2006)                                     | Australia              | CI, ICH        | 156    | 79.2 (6.7)                                        | 73/83            | DSM-IV          | Within 3 days post-stroke                                                    |
| Shih et al. (2007)                                      | Taiwan                 | PCA infraction | 29     | 65.55                                             | 4/25             | NA              | At admission                                                                 |
| McManus et al. (2009)                                   | UK                     | CI, ICH        | 82     | 66.4 (15.9)                                       | 31/51            | CAM             | Within 4 days of admission                                                   |
| Dahl et al. (2010)                                      | Norway                 | CI, hemorrhage | 188    | 73                                                | 76/102           | CAM, DSM-IV     | Within first week of admission                                               |
| Melkas et al. (2011)                                    | Finland                | Acute IS       | 263    | 70.8 (7.4)                                        | 128/135          | DSM-IV          | First 7 days after stroke                                                    |
| Oldenbeuving et al. (2011)                              | The Netherlands        | IS, hemorrhage | 527    | 72                                                | 239/288          | CAM, DRS        | Between days 2 and 4 after admission, and a second time between days 5 and 7 |
| Kostalova et al. (2012)                                 | Czech                  | CI, ISH        | 100    | 73.5 (11.5)                                       | 46/54            | CAM-ICU, DSM-IV | Within 24 hours of stroke onset                                              |
| Kara et al. (2013)                                      | Turkey                 | IS, hemorrhage | 150    | Delirium: 68.0 (1.87)<br>No Delirium: 61.2 (1.29) | 45/105           | DSM-IV, DRS     | First five days                                                              |
| Naidech et al. (2013)                                   | USA                    | ICH            | 98     | Delirium: 63.9 (12.1)<br>No Delirium: 61.7 (14.6) | NA               | CAM-ICU         | Within 28 days                                                               |
| Miu & Yeung (2013)                                      | Hong Kong              | CI, hemorrhage | 314    | 72.9 (10.3)                                       | 151/163          | CAM             | Day 1-5                                                                      |
| Turco et al. (2013)                                     | Italy                  | IS, hemorrhage | 176    | 81.7 (6.4)                                        | 118/58           | CAM, DSM-IV-TR  | At admission & at discharge                                                  |

|                                                                 |                   |                           |      |                                            |         |                      |                                                  |
|-----------------------------------------------------------------|-------------------|---------------------------|------|--------------------------------------------|---------|----------------------|--------------------------------------------------|
| Kozak et al. (2016)                                             | Turkey            | IS                        | 60   | 66.15 (12.53)                              | 31/29   | DSM-V, DRS           | During hospitalization                           |
| Alvarez-Perez et al. (2017)                                     | Portugal          | Acute IS, hemorrhage      | 1072 | 68^                                        | 507/565 | DSM-V                | During hospitalization                           |
| Ojagbemi et al. (2017)                                          | Nigeria           | IS, hemorrhage            | 99   | 61.1 (12.9)                                | 47/52   | CAM, DRS             | First 7 days of admission                        |
| Qu et al. (2018)                                                | China             | Acute IS                  | 261  | 61.3 (14.8)                                | 77/184  | CAM                  | Within first week after admission                |
| Hosoya et al. (2018)                                            | Japan             | CI, ICH, SAH              | 269  | Delirium: 75 (1.3) No Delirium: 69.3 (1.0) | 123/146 | ICDSC                | NA                                               |
| Kotfis et al. (2018, 2019)*                                     | Poland            | Acute IS                  | 1001 | 71^                                        | 478/523 | CAM-ICU, DSM-V       | Within 24 hours of admission                     |
| Lim et al. (2019)                                               | Republic of Korea | IS                        | 576  | 65.2                                       | 209/367 | CAM                  | During admission                                 |
| Pasinska et al. (2018, 2019a, & 2019b), Czyzycki et al. (2021)* | Poland            | Acute IS, TIA, hemorrhage | 750  | 71.75 (13.13)                              | 398/352 | bCAM, CAM-ICU, DSM-V | Between admission and 7th day                    |
| Aizen et al. (2019)                                             | Israel            | CI, ICH                   | 110  | 80.2 (8)                                   | 57/53   | CAM                  | From day 2 after admission to discharge          |
| Zaitun et al. (2019)                                            | Egypt             | CI, ICH, SAH              | 74   | 60.7 (11.5)                                | 34/40   | DSM-IV               | Within 3 days after stroke                       |
| Ng et al. (2019)                                                | Malaysia          | IS                        | 280  | 63.6 (13.7)                                | 94/186  | CAM                  | Within 7 days of stroke                          |
| Sauvigny et al. (2019)                                          | Germany           | SAH                       | 212  | 54.9 (13.4)                                | 134/78  | RASS                 | During the clinical course                       |
| Shaw et al. (2019)                                              | Scotland          | Stroke                    | 395  | Delirium: 79^ No Delirium: 65^             | 174/221 | DSM-V, 4AT           | Within 5 days of admission                       |
| Rollo et al. (2021)                                             | Italy             | IS, hemorrhage            | 120  | 71.8 (12.6)                                | 48/72   | CAM-ICU, RASS        | Baseline and repeated within 72 h from admission |
| Reimann et al. (2021)                                           | Austria           | SAH                       | 227  | 56 (14)                                    | 137/90  | ICDSC, RASS          | First 30 days after admission                    |
| Nakamizo et al. (2021)                                          | Japan             | IS, hemorrhage            | 387  | 75^                                        | 170/217 | ICDSC                | For 5 days from admission                        |

|                              |             |                |     |                                       |                      |                           |                                      |
|------------------------------|-------------|----------------|-----|---------------------------------------|----------------------|---------------------------|--------------------------------------|
| Guldof et al. (2021)         | Belgium     | AIS            | 514 | Delirium: 82^<br>No Delirium: 71^     | 237/277              | DSM-V                     | During the first 7 days of admission |
| Fialho Silva et al. (2021)   | Brazil      | IS, hemorrhage | 227 | 62.5 (13.5)                           | 106/121              | CAM-ICU, RASS             | Admission until discharge            |
| Marrama et al. (2021)        | France      | ICH            | 248 | 70.4 (12.7)                           | 114/134              | DRS, DSM-IV               | First seven days of hospitalization  |
| Stokholm et al. (2021)       | Denmark     | AIS            | 64  | 70 (9.8)                              | 22/42                | CAM                       | Hospitalization                      |
| Zisper et al. (2021)         | Switzerland | IS, hemorrhage | 567 | Delirium: 76.0^<br>No Delirium: 70.0^ | Delirium: male (115) | DOS, ICDSC, DSM-V         | First 3 days of admission            |
| Fleischmann et al. (2021)    | Germany     | IS, TIA        | 141 | 73.8 (10.4)                           | 61/80                | DMS-V , CAM, Nu-Desc, 4AT | Within 144hrs of admission           |
| Mengel et al. (2021)         | Germany     | AIS, TIA       | 573 | 74 (14)                               | 264/309              | ICDSC, RASS, DSM-V        | Within 90hrs of admission            |
| Reznik et al. (2020, 2022) * | USA         | ICH            | 590 | 70.5 (15.5)                           | 181/309              | DSM-V                     | During hospitalization               |
| Pendlebury et al. (2022)     | UK          | Stroke, TIA    | 194 | 79.5 (11.2)                           | 94/100               | DSM-IV, CAM, AMTS         | Admission                            |

CI, cerebral infraction; TIA, transient ischemic attack; ICH, intracerebral hemorrhage; DSM, Diagnostic and Statistical Manual of Mental Disorders; MMSE, mini-mental state examination; DRS, Delirium Rating Scale; SI, stroke unit; SAH, subarachnoid hemorrhage; PCA, posterior cerebral artery; NA, non-available; UK, United Kingdom; CAM, Confusion Assessment Method; IS, ischemic stroke; bCAM, abbreviated version of Confusion Assessment Method; CAM-ICU, Intensive Care Units version of Confusion Assessment Method; ICDSC, Intensive Care Delirium Screening Checklist; RASS, Richmond Agitation and Sedation Scale; DOS, Delirium Observation Screening Scale; 4AT, rapid assessment test for delirium; Nu-Desc, Nursing Delirium Screening Scale; AMTS, abbreviated mental test score

\*Data from one of the studies are presented

^median
