# Supplementary material for: The Role of Vascular Risk Factors in Post-Stroke Delirium: A Systematic Review and Meta-Analysis
Source: MDPI journal article supplement (doi:10.3390/jcm11195835), 2022-10-01
Supplement: s1 [file s1]

**Table S1.** Quality evaluation according to the Newcastle-Ottawa Scale (NOS – for case-control and cohort studies) and modified NOS (for cross-sectional studies)

| Study                       | Selection | Comparability | Exposure | NOS score |
|-----------------------------|-----------|---------------|----------|-----------|
| Gustafson et al. (1991)     | ***       | **            | **       | 7/9       |
| Nicolai & Lazzarino (1994)  | ***       | *             | *        | 5/9       |
| Henon et al. (1999)         | ****      | **            | ***      | 9/9       |
| Caerio et al. (2004)        | ***       | **            | **       | 7/9       |
| Sheng et al. (2006)         | ***       | **            | ***      | 8/9       |
| Shih et al. (2007)          | *         |               | *        | 2/9       |
| McManus et al. (2009)       | ***       | **            | ***      | 8/9       |
| Dahl et al. (2010)          | ***       | **            | **       | 7/9       |
| Melkas et al. (2011)        | ****      | **            | **       | 8/9       |
| Oldenbeuving et al. (2011)  | ****      | **            | ***      | 9/9       |
| Kostalova et al. (2012)     | ***       | **            | **       | 7/9       |
| Kara et al. (2013)          | ***       |               | **       | 5/9       |
| Naidech et al. (2013)       | ****      | **            | ***      | 9/9       |
| Miu & Yeung (2013)          | ****      | **            | **       | 8/9       |
| Turco et al. (2013)         | ***       |               | ***      | 6/9       |
| Kozak et al. (2016)         | **        |               | **       | 4/9       |
| Alvarez-Perez et al. (2017) | **        | **            | **       | 6/9       |
| Ojagbemi et al. (2017)      | ***       | **            | **       | 7/9       |

|                                                                |      |    |     |     |
|----------------------------------------------------------------|------|----|-----|-----|
| Qu et al. (2018)                                               | ***  | ** | **  | 7/9 |
| Hosoya et al. (2018)                                           | ***  | ** | **  | 7/9 |
| Kotfis et al. (2018, 2019)                                     | **   | ** | **  | 6/9 |
| Lim et al. (2019)                                              | ***  | ** | **  | 7/9 |
| Pasinska et. al (2018, 2019a, & 2019b), Czyzycki et al. (2021) | **** | ** | **  | 8/9 |
| Aizen et al. (2019)                                            | **   |    | **  | 4/9 |
| Zaitun et al. (2019)                                           | *    |    | **  | 3/9 |
| Ng et al. (2019)                                               | ***  | ** | **  | 7/9 |
| Sauvigny et al. (2019)                                         | **   | ** | *** | 7/9 |
| Shaw et al. (2019)                                             | **** | ** | **  | 8/9 |
| Rollo et al. (2021)                                            | ***  | ** | **  | 7/9 |
| Reimann et al. (2021)                                          | ***  | ** | **  | 7/9 |
| Nakamizo et al. (2021)                                         | **   | ** | *** | 7/9 |
| Guldof et al. (2021)                                           | **** | ** | *** | 9/9 |
| Fialho Silva et al. (2021)                                     | **** |    | *** | 7/9 |
| Marrama et al. (2021)                                          | **** | ** | **  | 8/9 |
| Stokholm et al. (2021)                                         | *    |    | **  | 3/9 |
| Zisper et al. (2021)                                           | ***  | ** | *** | 8/9 |
| Fleischmann et al. (2021)                                      | ***  | ** | *** | 8/9 |
| Mengel et al. (2021)                                           | ***  |    | *** | 6/9 |

|                                                                                                                                        |     |    |     |     |
|----------------------------------------------------------------------------------------------------------------------------------------|-----|----|-----|-----|
| Reznik et al. (2020, 2022) ^                                                                                                           | *** | ** | *** | 8/9 |
| Pendlebury et al. (2022)                                                                                                               | *** | ** | **  | 7/9 |
| The number of * corresponds to the number of items assessed positively in each category<br>^Data from one of the studies are presented |     |    |     |     |
