# Supplementary material for: The Role of Vascular Risk Factors in Post-Stroke Delirium: A Systematic Review and Meta-Analysis
Source: MDPI journal article supplement (doi:10.3390/jcm11195835), 2022-10-01
Supplement: s1 [file s1]

**Figures S4a to S4d. The Forest Plots presenting the results from meta-analysis of age, AF, prior stroke, and CAD in ICH and/or SAH subgroup**

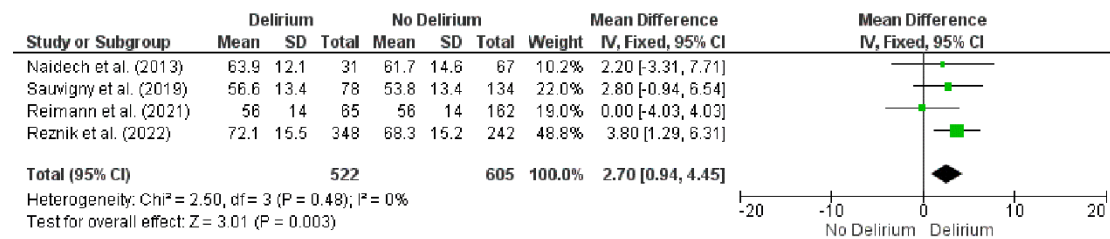

**Figures S4a. The Forest Plot presenting the results from meta-analysis of age and PSD in ICH and/or SAH subgroup**

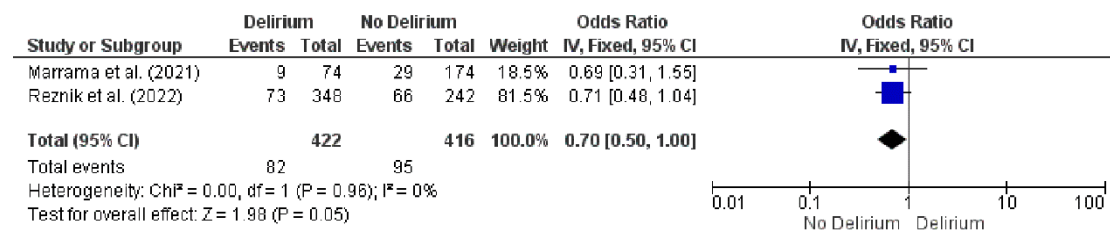

**Figures S4b. The Forest Plot presenting the results from meta-analysis of AF and PSD in in ICH and/or SAH subgroup**

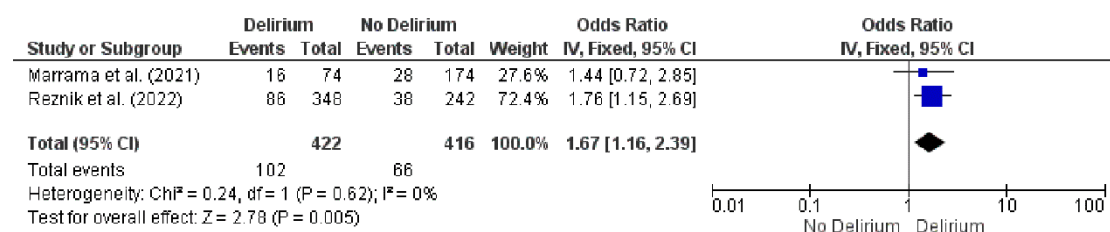

**Figures S4c. The Forest Plot presenting the results from meta-analysis of prior stroke and PSD in ICH and/or SAH subgroup**

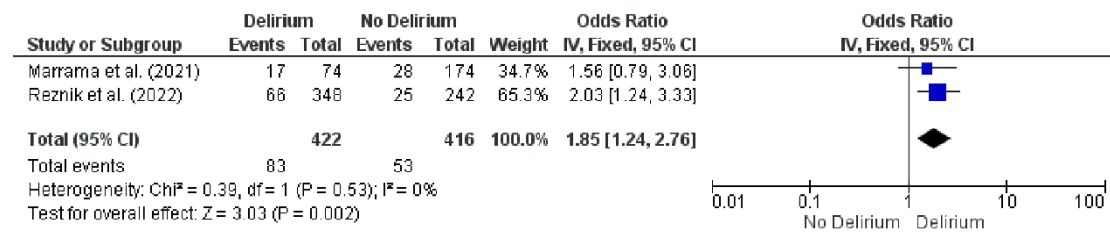

**Figures S4d. The Forest Plot presenting the results from meta-analysis of CAD and PSD in ICH and/or SAH subgroup**
