# Supplementary material for: The Role of Vascular Risk Factors in Post-Stroke Delirium: A Systematic Review and Meta-Analysis
Source: MDPI journal article supplement (doi:10.3390/jcm11195835), 2022-10-01
Supplement: s1 [file s1]

**Figures S1a to S1l. The Forest Plots presenting the results from meta-analysis of vascular risk factors and PSD**

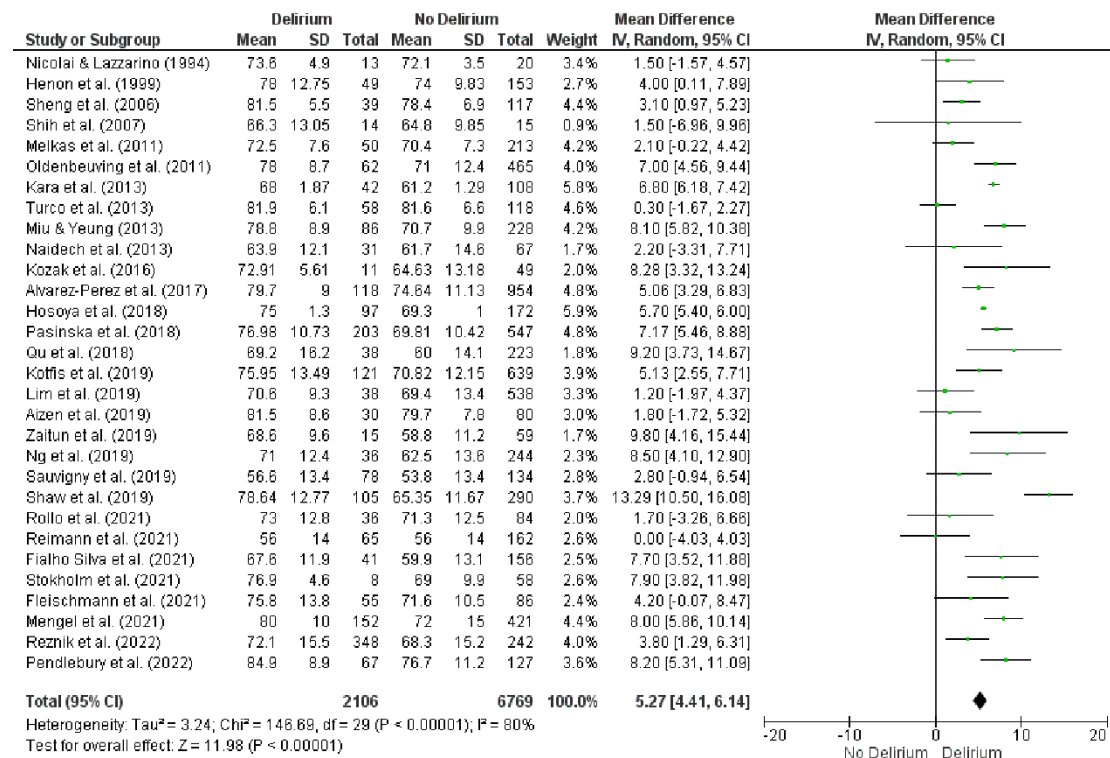

**Figure S1a. The Forest Plot presenting the results from meta-analysis of age and PSD**

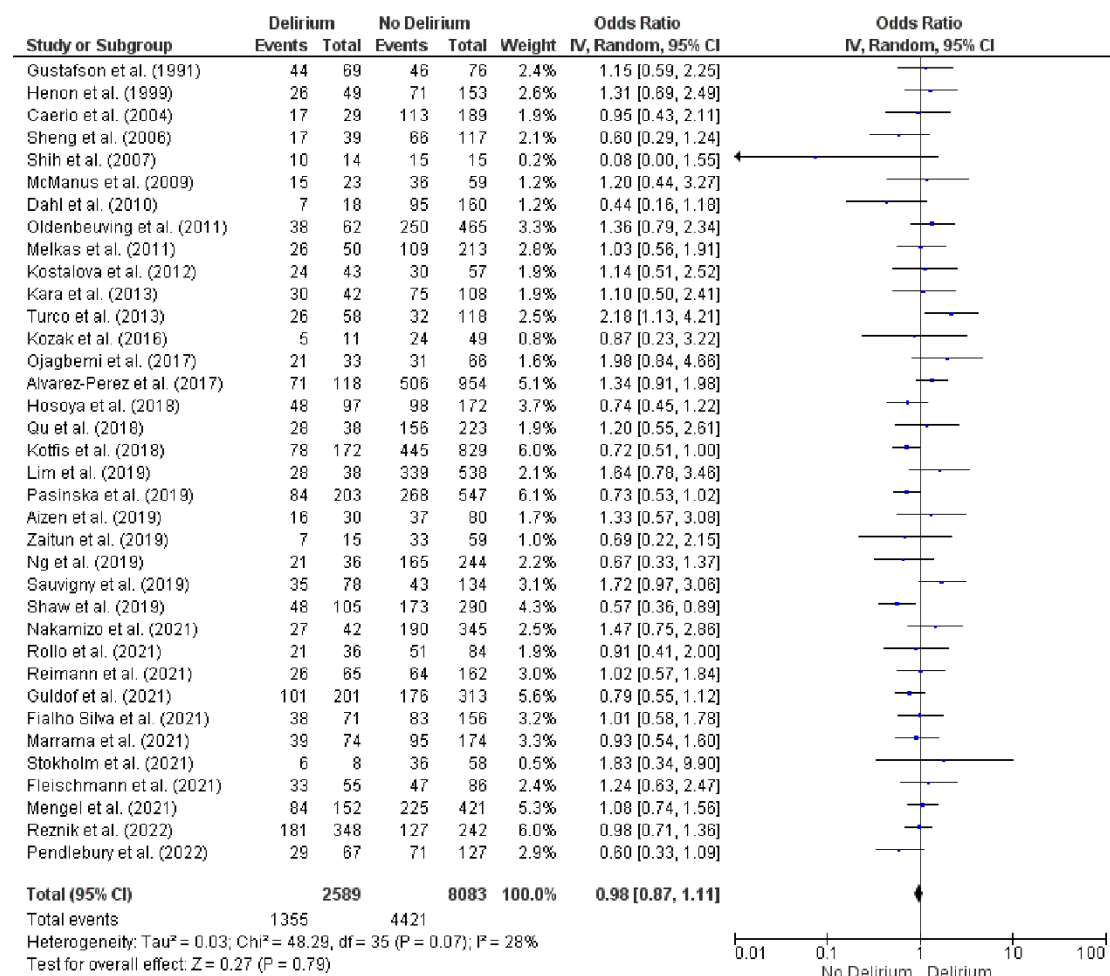

**Figure S1b. The Forest Plot presenting the results from meta-analysis of sex and PSD**

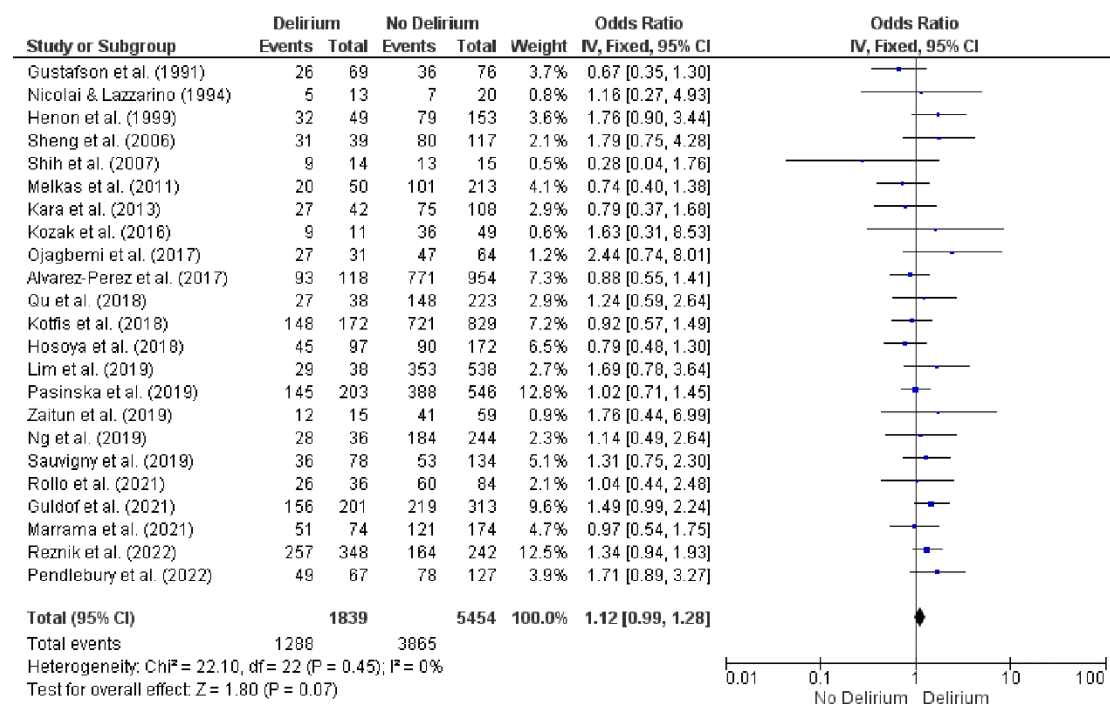

Figure S1c. The Forest Plot presenting the results from meta-analysis of hypertension and PSD

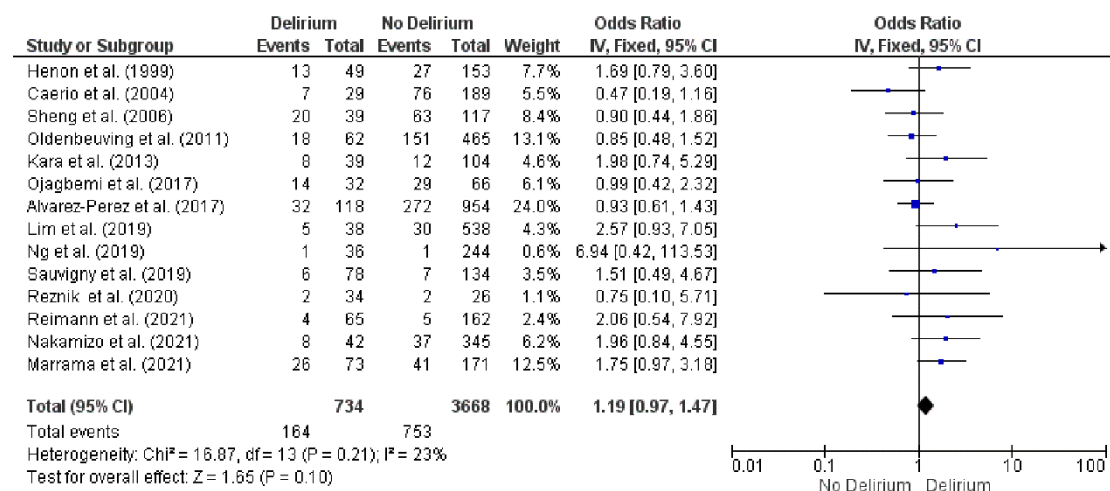

Figure S1d. The Forest Plot presenting the results from meta-analysis of alcohol and PSD

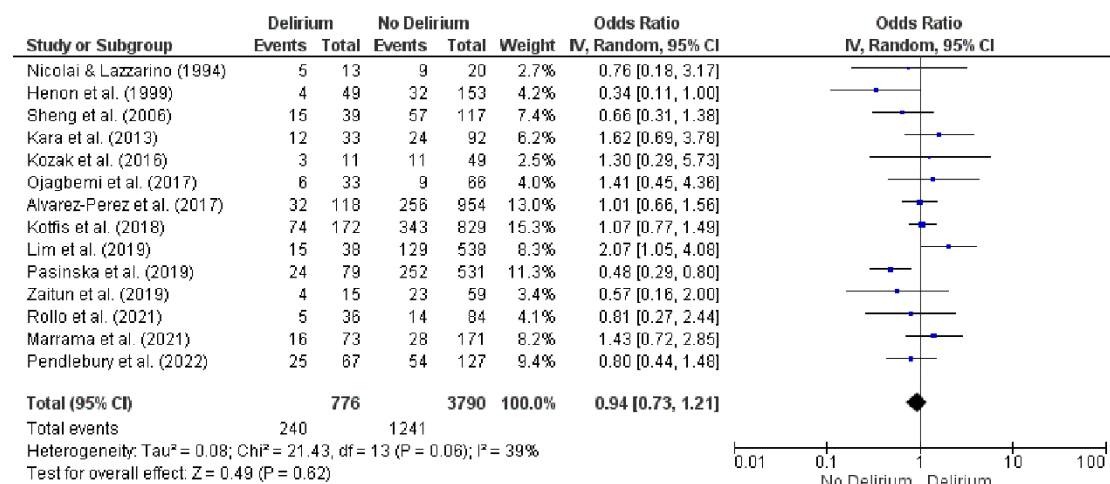

Figure S1e. The Forest Plot presenting the results from meta-analysis of smoking and PSD

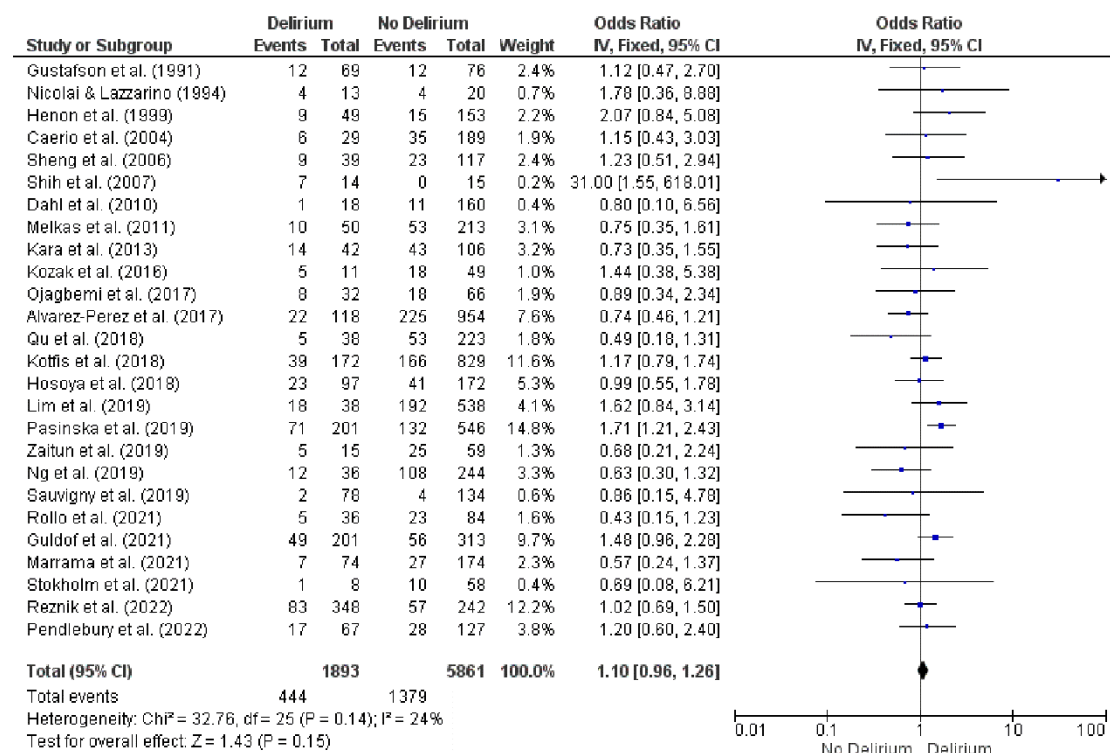

Figure S1f. The Forest Plot presenting the results from meta-analysis of DM and PSD

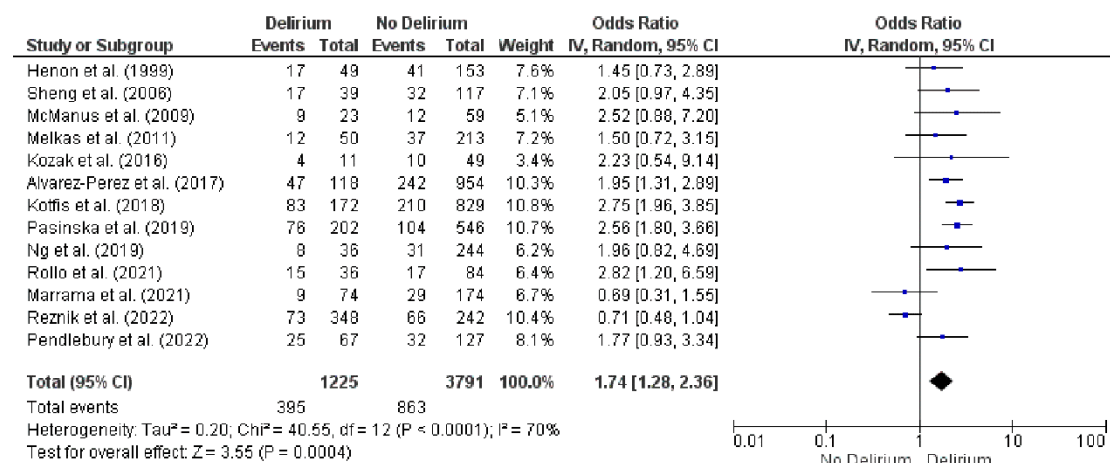

Figure S1g. The Forest Plot presenting the results from meta-analysis of AF and PSD

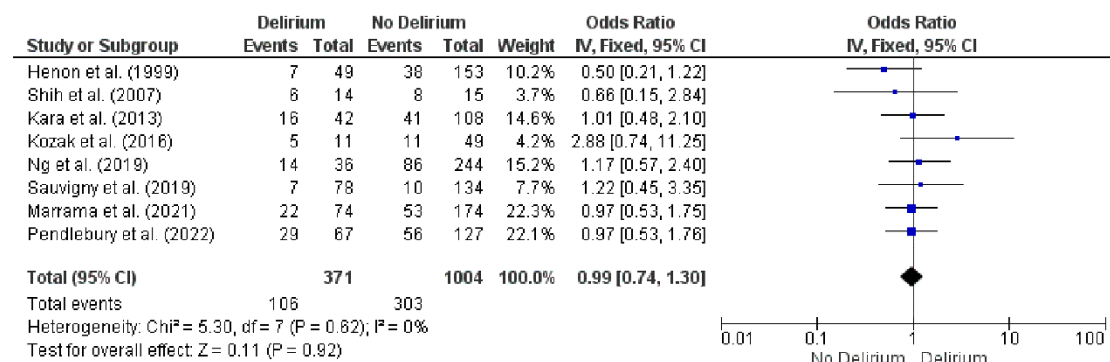

Figure S1h. The Forest Plot presenting the results from meta-analysis of hyperlipidemia and PSD

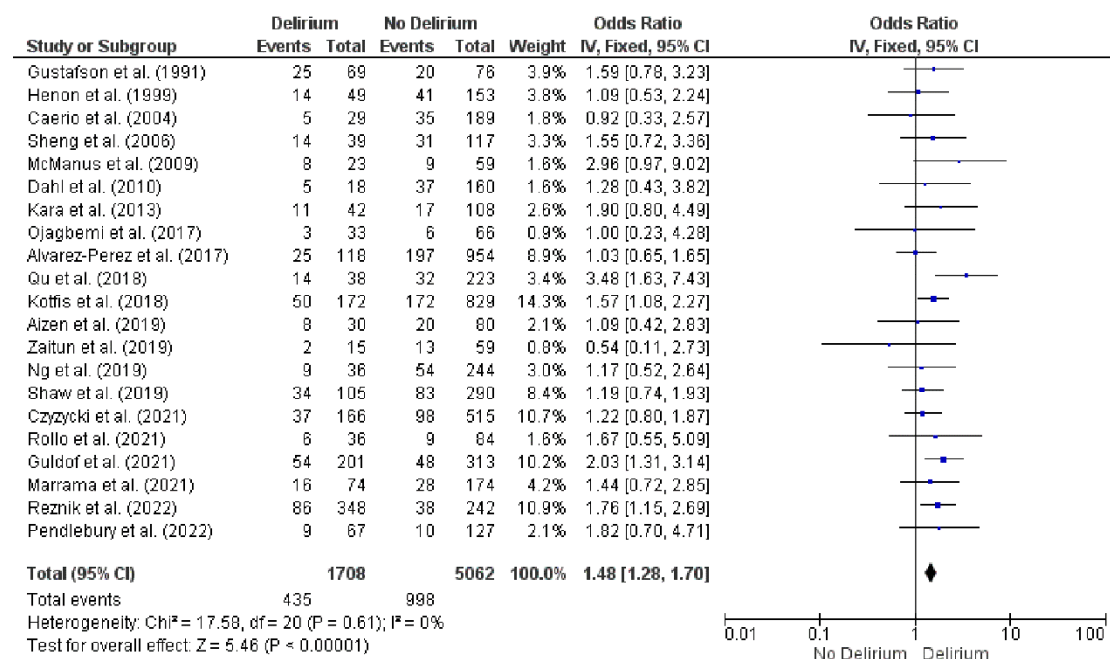

Figure S1i. The Forest Plot presenting the results from meta-analysis of prior stroke and PSD

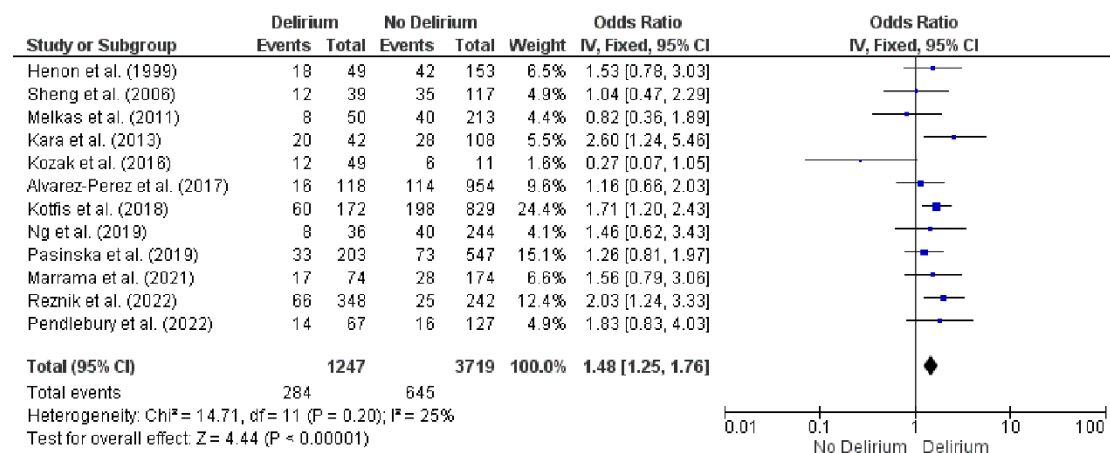

Figure S1g. The Forest Plot presenting the results from meta-analysis of CAD and PSD

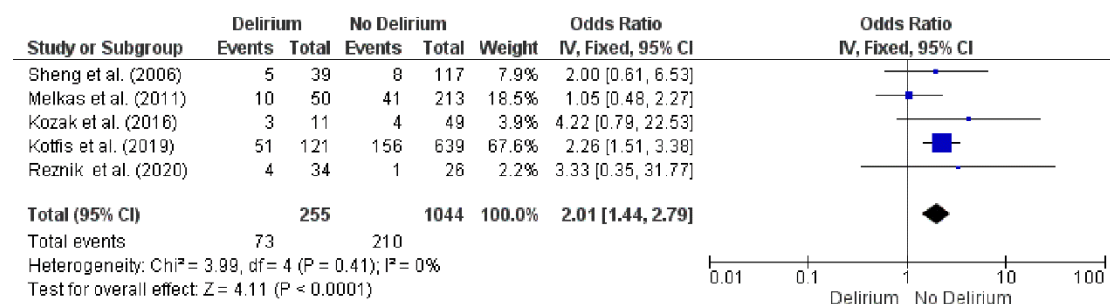

**Figure S1k. The Forest Plot presenting the results from meta-analysis of HF and PSD**

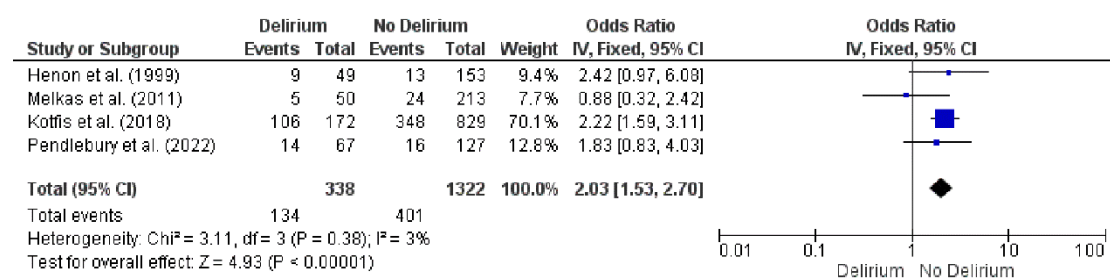

**Figure S1l. The Forest Plot presenting the results from meta-analysis of PVD and PSD**
