# Supplementary material for: The Role of Vascular Risk Factors in Post-Stroke Delirium: A Systematic Review and Meta-Analysis
Source: J Clin Med. 2022 Oct 1;11(19):5835. doi: 10.3390/jcm11195835 (PMC9571874; doi:10.3390/jcm11195835)
Supplement: Supplementary file 1 [file jcm-11-05835-s001.zip]

Archive with 7 entries (7 files):
- Figures S1a to S1l.pdf
- Figures S2a to S2l.pdf
- Figures S3a to S3f.pdf
- Figures S4a to S4d.pdf
- File S1.pdf
- Table S1.pdf
- Table S2.pdf
